# Supplementary material
Source: publisher figshare collection journal article supplement (https://sage.figshare.com/ndownloader/files/38942767)
Supplement: Supplementary file 1 [file 38942767]

EBSCOHost platform

1. (standard OR kpi OR key performance indicator OR outcome indicator OR quality indicator OR process measure* OR performance indicator OR benchmark).ti,ab.
2. (develop* OR creat* OR identif* OR establish* or defin*).ti,ab.
3. (Digital health OR eHealth OR e-health OR e health OR mhealth OR m-health OR m health).ti,ab
4. ((web-base* OR web base*) N5 health*).ti,ab.
5. 3 OR 4
6. 1 AND 2 AND 5

IEEE Xplore Database:

(("All Metadata": standard OR kpi OR "key performance indicator" OR "outcome indicator" OR "quality indicator" OR "process measure" OR "performance indicator" OR benchmark) AND ("All Metadata": develop* OR creat* OR identif* OR establish* OR defin*) AND (("All Metadata": "Digital health" OR eHealth OR e-health OR "e health" OR mhealth OR m-health OR "m health") OR ("All Metadata": health NEAR/5 web-base*) OR ("All Metadata": health NEAR/5 web base*)))
